# Supplementary material
Source: MDPI journal article supplement (https://www.mdpi.com/2073-4441/13/23/3459)
Supplement: s1 [file s1]

**Table S1.** The C:N ratio for 13 fish species in the Kizil Reservoir.

| Species                         | C:N         |
|---------------------------------|-------------|
| Native species                  |             |
| <i>Aspiorhynchus laticeps</i>   | 3.53 ± 0.16 |
| <i>Schizothorax biddulphi</i>   | 3.67 ± 0.16 |
| <i>Schizothorax eurystomus</i>  | 3.50 ± 0.17 |
| <i>Schizothorax intermedius</i> | 3.80 ± 0.19 |
| <i>Schizothorax barbatus</i>    | 3.65 ± 0.18 |
| Non-native species              |             |
| <i>Silurus asotus</i>           | 3.45 ± 0.14 |
| <i>Ctenopharyngodon idellas</i> | 3.37 ± 0.13 |
| <i>Rhinogobius giurinus</i>     | 3.53 ± 0.26 |
| <i>Pseuderasboea parva</i>      | 3.59 ± 0.18 |
| <i>Cyprinus carpio</i>          | 3.65 ± 0.46 |
| <i>Carassius auratus</i>        | 3.61 ± 0.25 |
| <i>Hemiculter leacisculus</i>   | 3.52 ± 0.19 |
| <i>Abbottina rivularis</i>      | 3.63 ± 0.19 |
| Total                           | 3.58 ± 0.27 |
